# Supplementary material for: Cyano-functionalized small-molecule acceptors for high-efficiency wide-bandgap organic solar cells
Source: Royal Society of Chemistry journal article supplement (doi:10.1039/d0tc02061c), 2020-01-01
Supplement: d0tc02061c1.pdf [file d0tc02061c1.pdf]

## Supporting Information

### **Cyano-functionalized Small-Molecule Acceptors for High-Efficiency Wide-Bandgap Organic Solar Cells**

Jun Zhang,<sup>‡,a,c</sup> Jie Lv,<sup>‡,a,b</sup> Xiyue Dong,<sup>a,b</sup> Tongle Xu,<sup>a,b</sup> Xuexin Dai,<sup>a,d</sup> Tainan Duan<sup>\*a</sup>, Zhipeng Kan,<sup>\*a</sup> Ping Liu<sup>c</sup> and Shirong Lu<sup>\*a</sup>

<sup>a</sup> *Chongqing Institute of Green and Intelligent Technology, Chinese Academy of Sciences, Chongqing, 400714, China*

<sup>b</sup> *University of Chinese Academy of Sciences, Beijing 100049, China*

<sup>c</sup> *School of Chemistry and Chemical Engineering, The Key Laboratory for Green Processing of Chemical Engineering of Xinjiang Bingtuan, Shihezi University, Shihezi City, 832004, China.*

<sup>d</sup> *School of Chemistry and Chemical Engineering, Qiannan Normal University for Nationalities, Duyun, Guizhou Province 558000, China*

## Content:

|                                                                        |           |
|------------------------------------------------------------------------|-----------|
| <b>Supporting Information .....</b>                                    | <b>1</b>  |
| <b>1. General Experimental Details .....</b>                           | <b>3</b>  |
| <b>2. Synthetic Protocols and Characterizations .....</b>              | <b>5</b>  |
| <b>3. UV-Vis Absorption Spectra and Energy Level Diagram .....</b>     | <b>7</b>  |
| <b>4. TGA curves of IDT-BC and IDT-C8-BC.....</b>                      | <b>8</b>  |
| <b>5. Device Fabrication and Characterization .....</b>                | <b>9</b>  |
| <b>6. Additional OPV Device Performance Data .....</b>                 | <b>11</b> |
| <b>7. Light-Intensity Dependence Statistics.....</b>                   | <b>15</b> |
| <b>8. SCLC Measurements.....</b>                                       | <b>16</b> |
| <b>9. Transmission Electron Microscopy (TEM) Characterization.....</b> | <b>17</b> |
| <b>10. Solution NMR and HR-MS spectra .....</b>                        | <b>18</b> |
| <b>11. Supporting Information References .....</b>                     | <b>21</b> |

## 1. General Experimental Details

**Instrument:**  $^1\text{H}$  NMR and  $^{13}\text{C}$  NMR spectra were obtained on an AVANCE500 nuclear magnetic resonance (NMR) spectroscope. UV-vis absorption spectra were recorded on a Perkin Elmer Lambda 365 spectrophotometer. Thermogravimetric analysis (TGA) was carried out on a WCT-2 thermal balance under protection of nitrogen at a heating rate of  $10\text{ }^\circ\text{C}/\text{min}$ .

Cyclic voltammetry (CV) measurements were done on the 600E electrochemical workstation with a three electrode system: a glassy carbon electrode as the working electrode, a platinum wire electrode as the counter electrode and a Ag/AgCl electrode as the reference electrode. The 0.1 M solution of tetrabutylammonium hexafluorophosphate ( $\text{Bu}_4\text{NPF}_6$ ) in acetonitrile was used as an electrolyte. The CV curves were recorded and calibrated by the ferrocene-ferrocenium ( $\text{Fc}/\text{Fc}^+$ ) redox couple ( $-4.8\text{ eV}$  versus vacuum level). The materials were measured by coating a film on the surface of working electrode. The HOMO and LUMO levels are calculated by the formula:  $E_{\text{HOMO}} = -[E_{\text{OX}} + (4.8 - E_{\text{Fc}/\text{Fc}^+})]$ ,  $E_{\text{LUMO}} = -[E_{\text{RED}} + (4.8 - E_{\text{Fc}/\text{Fc}^+})]$ , where  $E_{\text{OX}}/E_{\text{RED}}$  means the potential from the first oxidation or reduction peak and  $E_{\text{Fc}/\text{Fc}^+}$  means the half-wave potential of the external standard.

**Materials:** All reagents and solvents, unless otherwise specified, were purchased from Energy Chemical, Tansoole and Derthon Optoelectronic Materials Science Technology Co LTD and were used without further purification. PBDB-T was purchased from Solarmer Energy Inc. IDT-SnMe<sub>3</sub>, IDT-C8-SnMe<sub>3</sub> and Br-BC were synthesized according to literature reports,<sup>1-3</sup> and the compounds IDT-BC and IDT-C8-BC were synthesized according to reported literature. All reactions were performed under nitrogen atmosphere and solvents were purified and dried from appropriate drying agents using standard techniques prior to use. Flash

chromatography was performed by using Silicycle Silica Flash P60 silica gel. Silica gel on TLC-PET foils from Fluka was used for TLC.

## 2. Synthetic Protocols and Characterizations

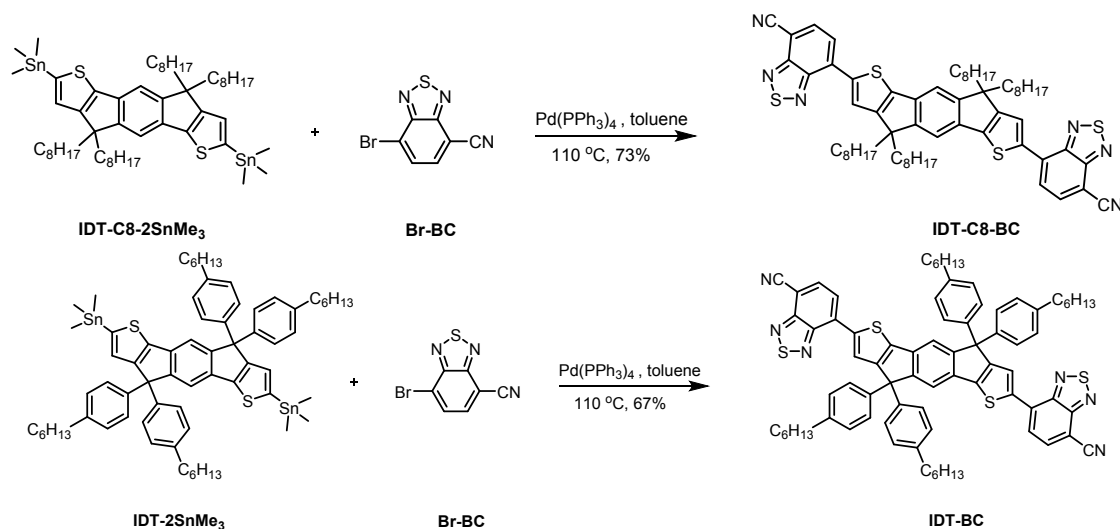

**Figure S1.** The detailed synthetic routes toward the target structures IDT-BC and IDT-C8-BC.

### Synthesis of IDT-BC

To a three-necked round bottom flask were added (4,4,9,9-tetrakis(4-hexylphenyl)-4,9-dihydro-*s*-indaceno[1,2-*b*:5,6-*b'*]dithiophene-2,7-diyl)bis(trimethylstannane) (150 mg, 0.12 mmol), 7-bromobenzo[*c*][1,2,5]thiadiazole-4-carbonitrile (151 mg, 0.63 mmol) and toluene (20 mL). The mixture was deoxygenated with argon for 15 min, and then Pd(PPh<sub>3</sub>)<sub>4</sub> (21 mg, 0.018 mmol) was added. The mixture was refluxed for 24 h and then cooled to room temperature. 40 mL KF solution was added and stirred at room temperature overnight to remove the tin impurity. Water (150 mL) was added and the mixture was extracted with CHCl<sub>3</sub>. The organic phase was dried over anhydrous MgSO<sub>4</sub>. After removing the solvent, the residue was purified by column chromatography on silica gel using petroleum ether/CHCl<sub>3</sub> (1:2) as eluent yielding a Purple black solid (102 mg, 67%). <sup>1</sup>H NMR (600 MHz, CDCl<sub>3</sub>) δ 8.18 (s, 2H), 7.96 (d, *J* = 7.6 Hz, 2H), 7.82 (d, *J* = 7.6 Hz, 2H), 7.58 (s, 2H), 7.24 (d, *J* = 8.1 Hz, 8H), 7.11 (d, *J* = 8.2 Hz, 8H), 2.57 (t, *J* = 7.9 Hz, 8H), 1.59 (m, 8H), 1.35 – 1.27 (m, 24H), 0.88 – 0.84 (m, 12H). <sup>13</sup>C NMR (151 MHz, CDCl<sub>3</sub>) δ 157.59, 154.38, 153.81, 151.08, 146.25, 141.93, 141.23, 140.70, 135.88, 135.72, 132.93, 128.56,

127.86, 126.03, 122.59, 118.30, 115.73, 102.33, 63.25, 35.57, 31.70, 31.32, 29.70, 29.13, 22.58, 14.06. MS (MALDI-TOF): calcd for C<sub>78</sub>H<sub>76</sub>N<sub>6</sub>S<sub>4</sub> (M<sup>+</sup>): 1225.7480, Found: 1225.5154.

### Synthesis of **IDT-C8-BC**

To a three-necked round bottom flask were added (4,4,9,9-tetraoctyl-4,9-dihydro-s-indaceno[1,2-b:5,6-b']dithiophene-2,7-diyl)bis(trimethylstannane) (200 mg, 0.2 mmol), 7-bromobenzo[c][1,2,5]thiadiazole-4-carbonitrile (124 mg, 0.52 mmol) and toluene (20 mL). The mixture was deoxygenated with argon for 15 min, and then Pd(PPh<sub>3</sub>)<sub>4</sub> (35 mg, 0.03 mmol) was added. The mixture was refluxed for 24 h and then cooled to room temperature. 40 mL KF solution was added and stirred at room temperature overnight to remove the tin impurity. Water (150 mL) was added and the mixture was extracted with CHCl<sub>3</sub>. The organic phase was dried over anhydrous MgSO<sub>4</sub>. After removing the solvent, the residue was purified by column chromatography on silica gel using petroleum ether/CHCl<sub>3</sub> (1:2) as eluent yielding a purple black solid (152 mg, 73%). <sup>1</sup>H NMR (600 MHz, CD<sub>2</sub>Cl<sub>2</sub>) δ 8.27 (s, 2H), 8.05 (d, *J* = 7.6 Hz, 2H), 7.96 (d, *J* = 7.6 Hz, 2H), 7.51 (s, 2H), 2.13 (m, 4H), 2.00 (m, 4H), 1.11 (s, 40H), 0.96 – 0.86 (m, 8H), 0.77 (t, *J* = 7.1 Hz, 12H). <sup>13</sup>C NMR (151 MHz, CD<sub>2</sub>Cl<sub>2</sub>) δ 158.42, 155.59, 155.36, 152.57, 148.21, 141.36, 137.76, 137.47, 134.59, 126.30, 123.80, 117.26, 115.52, 103.12, 55.81, 40.43, 33.11, 31.24, 30.58, 30.47, 25.57, 23.90, 15.10. MS (MALDI-TOF): calcd for C<sub>62</sub>H<sub>76</sub>N<sub>6</sub>S<sub>4</sub> (M<sup>+</sup>): 1033.5720, Found: 1032.5164.

### 3. UV-Vis Absorption Spectra and Energy Level Diagram

UV-Vis absorption spectra of IDT-BC and IDT-C8-BC were recorded on PerkinElmer LAMBDA 365 UV-Vis spectrophotometer.

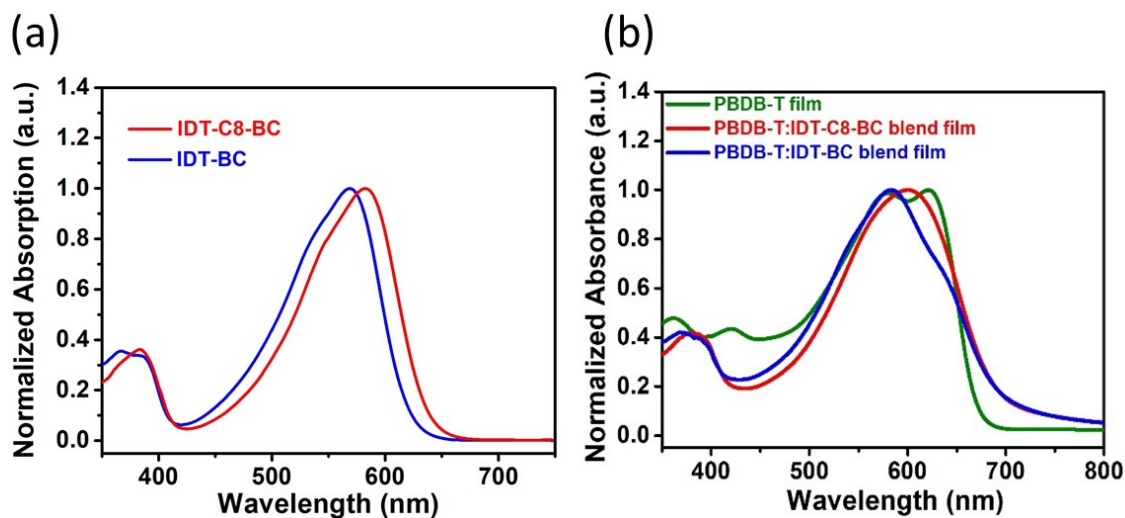

**Figure S2.** (a) Normalized solution (chloroform) UV-vis absorption spectra of the two SM acceptors. (b) Normalized absorption spectra of the donor PBDB-T and the blend films of PBDB-T:IDT-C8-BC, PBDB-T:IDT-BC.

#### Energy Level Diagram

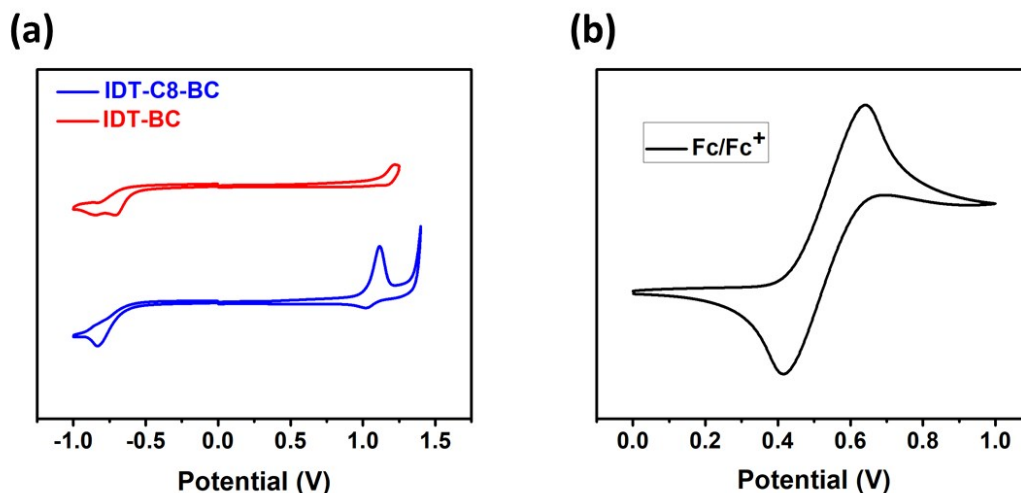

**Figure S3.** (a) Cyclic voltammograms of IDT-BC, IDT-C8-BC and (b) Fc/Fc<sup>+</sup> in CH<sub>3</sub>CN solutions.

#### 4. TGA curves of IDT-BC and IDT-C8-BC

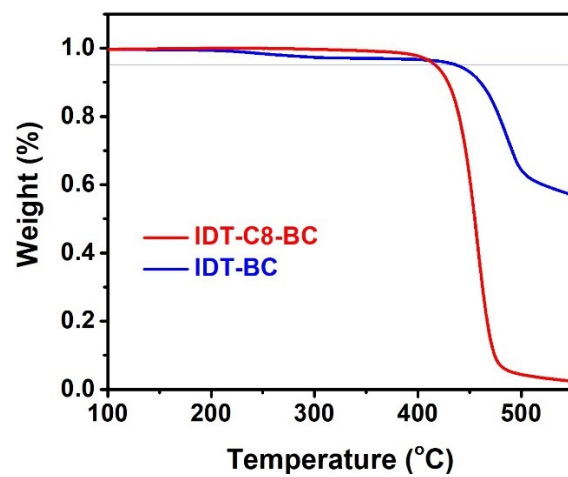

**Figure S4.** TGA curves of IDT-BC and IDT-C8-BC.



## 5. Device Fabrication and Characterization

The organic solar cells were prepared on glass substrates with tin-doped indium oxide (ITO, 15  $\Omega$ /sq) patterned on the surface (device area: 0.11 cm<sup>2</sup>). Substrates were prewashed with isopropanol to remove organic residues before immersing in an ultrasonic bath of soap for 15 min. Samples were rinsed in flowing deionized water for 5 min before being sonicated for 15 min each in successive baths of deionized water, acetone and isopropanol. Next, the samples were dried with pressurized nitrogen before being exposed to a UV-ozone plasma for 20 min. ZnO precursor solution (ZnO precursor solution (ZnAc $\cdot$ 2H<sub>2</sub>O of 0.4g was dissolved in 5mL ethylene glycol monomethyl ether, and the ethanolamine of 107.8uL was added to prepare a 0.36 mol/L ZnO precursor solution, and then filtered through a 0.45  $\mu$ m PVDF filter) was spin-coated on to ITO substrates at a spinning rate of 4000 rpm for 30s in dried air, followed by baked on a hot plate at 150°C for 30 min to form a thin ZnO layer ( $\approx$ 40 nm), and the substrates were then transferred into the glovebox for active layer deposition. ( $<$  0.1 ppm O<sub>2</sub>).

All solutions were prepared in the glovebox using the polymer donor PBDB-T and the SM acceptors IDT-BC and IDT-C8-BC; the polymer donor PBDB-T was purchased from Brilliant Matters. Optimized devices were obtained by dissolving PCE10, IDT-BC and IDT-C8-BC in chlorobenzene (CB) using a D/A ratio of 1:1.5 and 1:1.5 (wt/wt), respectively, total concentration of 15mg/ml. Note: The as-prepared CB solutions were stirred for 8 hours at 80°C before being cast on the (room temperature) substrates. The active layers with CB solutions were spin-coated at an optimized speed of 2500 rpm for time period of 40s, resulting in films of 100 to 110 nm in thickness. After annealing of 150°C, 10 min and 90°C, 10 min, respectively, the substrates were immediately moved into an evaporator. A molybdenum trioxide interlayer (MoO<sub>3</sub>, 8 nm) and Ag layer (100 nm) were deposited onto the surface of

the active layer through a shadow mask under high vacuum (less than  $2 \times 10^{-6}$  Torr). The area for each device is  $0.11 \text{ cm}^2$ .

Following electrode deposition, samples underwent  $J-V$  testing. J-V measurements of solar cells were performed in the glovebox with a Keithley 2400 source meter. A 300 W xenon arc solar simulator (Oriel) with an AM 1.5 global filter operated at  $100 \text{ mW/cm}^2$  was used to simulate the AM 1.5G solar irradiation. The illumination intensity was corrected by using a silicon photodiode with a protective KG5 filter calibrated by the National Institute of Metrology (NIM). The EQE spectra were measured using a Solar Cell Spectral Response Measurement System QE-R3011 (Enlitech Co., Ltd.). The light intensity at each wavelength was calibrated using a standard monocrystalline Si photovoltaic cell.

## 6. Additional OPV Device Performance Data

From **Table S1** to **Table S4**, a summary of the photovoltaic performance parameters of IDT-C8-BC under various preparation process conditions and the photovoltaic performance parameters of IDT-BC with different process conditions from **Table S5** to **Table S8**.

**Table S1.** The photovoltaic parameters of the IDT-C8-BC for the devices with the different condition treatment. All the Data were obtained under illumination of AM 1.5G, 100 mW/ cm<sup>2</sup> light source.

| D:A ratio | Condition     | <sup>a)</sup> V <sub>OC</sub> [V] | <sup>a)</sup> J <sub>SC</sub> [mA/cm <sup>2</sup> ] | <sup>a)</sup> FF [%] | <sup>a)</sup> PCE [%] |
|-----------|---------------|-----------------------------------|-----------------------------------------------------|----------------------|-----------------------|
| 1:1       | As Cast       | 1.05 (1.05±0.00)                  | 7.75 (7.65±0.09)                                    | 40.2 (39.5±0.7)      | 3.3 (3.2±0.1)         |
| 1:1       | 100°C, 10 min | 1.06 (1.05±0.01)                  | 10.59 (10.51±0.08)                                  | 58.5 (56.7±1.8)      | 6.6 (6.3±0.3)         |
| 1:1       | 0.5% CN       | 1.06 (1.05±0.01)                  | 10.07 (9.65±0.42)                                   | 57.1 (55.8±1.3)      | 6.1 (5.6±0.5)         |
| 1:1       | 0.5% DIO      | 1.06 (1.05±0.01)                  | 9.64 (9.60±0.04)                                    | 64.2 (59.0±5.2)      | 6.5 (6.0±0.5)         |
| 1:1       | 0.5% DPE      | 1.08 (1.06±0.02)                  | 9.98 (9.85±0.13)                                    | 54.7 (53.3±1.4)      | 5.9 (5.6±0.4)         |
| 1:1       | 0.5% NMP      | 1.06 (1.05±0.01)                  | 9.90 (9.95±0.05)                                    | 55.6 (52.3±3.3)      | 5.8 (5.5±0.3)         |

a) The average parameters were calculated over 10 independent cells.

**Table S2.** The photovoltaic parameters of the IDT-C8-BC for the devices with the different D:A ratio at thermal treatment 100°C, 10 min. All the Data were obtained under illumination of AM 1.5G, 100 mW/ cm<sup>2</sup> light source.

| D:A ratio | Condition     | <sup>a)</sup> V <sub>OC</sub> [V] | <sup>a)</sup> J <sub>SC</sub> [mA/cm <sup>2</sup> ] | <sup>a)</sup> FF [%] | <sup>a)</sup> PCE [%] |
|-----------|---------------|-----------------------------------|-----------------------------------------------------|----------------------|-----------------------|
| 1:1       | 100°C, 10 min | 1.06 (1.05±0.01)                  | 10.59 (10.51±0.08)                                  | 58.5 (56.7±1.8)      | 6.6 (6.3±0.3)         |
| 1:1.5     | 100°C, 10 min | 1.05 (1.05±0.01)                  | 10.02 (9.30±0.71)                                   | 65.6 (64.9±0.7)      | 6.9 (6.4±0.5)         |
| 1:2       | 100°C, 10 min | 1.05 (1.04±0.01)                  | 8.77 (8.68±0.09)                                    | 68.5 (66.7±1.8)      | 6.3 (6.0±0.3)         |

a) The average parameters were calculated over 10 independent cells.

**Table S3.** The photovoltaic parameters of the IDT-C8-BC for the devices with the different thermal treatment. All the data were obtained under illumination of AM 1.5G, 100 mW/ cm<sup>2</sup> light source.

| D:A ratio | Condition     | <sup>a)</sup> V <sub>OC</sub> [V] | <sup>a)</sup> J <sub>SC</sub> [mA/cm <sup>2</sup> ] | <sup>a)</sup> FF [%] | <sup>a)</sup> PCE [%] |
|-----------|---------------|-----------------------------------|-----------------------------------------------------|----------------------|-----------------------|
| 1:1.5     | 60°C, 10 min  | 1.10 (1.08±0.02)                  | 9.69 (9.56±0.13)                                    | 58.7 (58.5±0.2)      | 6.3 (6.1±0.2)         |
| 1:1.5     | 70°C, 10 min  | 1.08 (1.06±0.02)                  | 10.50 (10.17±0.33)                                  | 62.3 (61.5±0.8)      | 7.1 (6.7±0.4)         |
| 1:1.5     | 80°C, 10 min  | 1.05 (1.05±0.00)                  | 10.70 (10.45±0.25)                                  | 64.3 (60.9±3.4)      | 7.2 (6.7±0.5)         |
| 1:1.5     | 90°C, 10 min  | 1.05 (1.05±0.01)                  | 10.27 (10.06±0.21)                                  | 67.6 (65.4±2.2)      | 7.3 (7.0±0.3)         |
| 1:1.5     | 100°C, 10 min | 1.05 (1.05±0.01)                  | 10.02 (9.30±0.71)                                   | 65.6 (64.9±0.7)      | 6.9 (6.4±0.5)         |

a) The average parameters were calculated over 10 independent cells.

**Table S4.** The photovoltaic parameters of the IDT-C8-BC for the devices with the different amount of DIO treatment. All the data were obtained under illumination of AM 1.5G, 100 Mw/ cm<sup>2</sup> light source.

| D:A ratio | Condition | <sup>a)</sup> V <sub>OC</sub> [V] | <sup>a)</sup> J <sub>SC</sub> [mA/cm <sup>2</sup> ] | <sup>a)</sup> FF [%] | <sup>a)</sup> PCE [%] |
|-----------|-----------|-----------------------------------|-----------------------------------------------------|----------------------|-----------------------|
| 1:1.5     | 0.5% DIO  | 1.06 (1.05±0.01)                  | 9.58 (9.53±0.05)                                    | 60.7 (57.8±2.9)      | 6.2 (5.8±0.4)         |
| 1:1.5     | 1% DIO    | 1.08 (1.06±0.02)                  | 9.97 (9.86±0.11)                                    | 58.4 (55.2±3.3)      | 6.3 (5.8±0.5)         |
| 1:1.5     | 1.5% DIO  | 1.08 (1.07±0.01)                  | 9.78 (9.69±0.09)                                    | 55.3 (52.5±2.8)      | 5.9 (5.5±0.4)         |
| 1:1.5     | 2% DIO    | 1.03 (1.02±0.01)                  | 9.34 (9.30±0.04)                                    | 54.3 (50.2±3.9)      | 5.2 (4.8±0.4)         |

a) The average parameters were calculated over 10 independent cells.

**Table S5.** The photovoltaic parameters of the IDT-BC for the devices with the the different thermal treatment. All the data were obtained under illumination of AM 1.5G, 100 mW/ cm<sup>2</sup> light source.

| D:A ratio | Condition     | <sup>a)</sup> V <sub>OC</sub> [V] | <sup>a)</sup> J <sub>SC</sub> [mA/cm <sup>2</sup> ] | <sup>a)</sup> FF [%] | <sup>a)</sup> PCE [%] |
|-----------|---------------|-----------------------------------|-----------------------------------------------------|----------------------|-----------------------|
| 1:1       | As Cast       | 1.11 (1.08±0.03)                  | 8.52 (8.49±0.03)                                    | 41.9 (40.0±1.9)      | 4.0 (3.7±0.3)         |
| 1:1       | 100°C, 10 min | 1.09 (1.05±0.04)                  | 9.05 (8.97±0.08)                                    | 42.7 (42.1±0.6)      | 4.2 (3.9±0.3)         |
| 1:1       | 120°C, 10 min | 1.09 (1.07±0.02)                  | 9.16 (9.02±0.14)                                    | 46.2 (41.9±4.3)      | 4.6 (4.1±0.5)         |
| 1:1       | 140°C, 10 min | 1.05 (1.05±0.01)                  | 10.27 (10.03±0.24)                                  | 44.9 (43.0±1.9)      | 4.8 (4.5±0.3)         |

| D:A ratio | Condition     | <sup>a)</sup> V <sub>OC</sub> [V] | <sup>a)</sup> J <sub>SC</sub> [mA/cm <sup>2</sup> ] | <sup>a)</sup> FF [%] | <sup>a)</sup> PCE [%] |
|-----------|---------------|-----------------------------------|-----------------------------------------------------|----------------------|-----------------------|
| 1:1       | 150°C, 10 min | 1.06 (1.05±0.01)                  | 10.87 (10.37±0.50)                                  | 54.0 (49.1±4.9)      | 6.2 (5.4±0.8)         |
| 1:1       | 160°C, 10 min | 1.05 (1.05±0.00)                  | 10.11 (10.09±0.02)                                  | 55.5 (53.5±2.0)      | 5.9 (5.7±0.2)         |

a) The average parameters were calculated over 10 independent cells.

**Table S6.** The photovoltaic parameters of the IDT-BC for the devices with the different additive treatment. All the data were obtained under illumination of AM 1.5G, 100 mW/ cm<sup>2</sup> light source.

| D:A ratio | Condition     | <sup>a)</sup> V <sub>OC</sub> [V] | <sup>a)</sup> J <sub>SC</sub> [mA/cm <sup>2</sup> ] | <sup>a)</sup> FF [%] | <sup>a)</sup> PCE [%] |
|-----------|---------------|-----------------------------------|-----------------------------------------------------|----------------------|-----------------------|
| 1:1       | As Cast       | 1.11 (1.08±0.03)                  | 8.52 (8.49±0.03)                                    | 41.9 (40.0±1.9)      | 4.0 (3.7±0.3)         |
| 1:1       | 150°C, 10 min | 1.06 (1.05±0.01)                  | 10.87 (10.37±0.50)                                  | 54.0 (49.1±4.9)      | 6.2 (5.4±0.8)         |
| 1:1       | 0.5% CN       | 1.14 (1.09±0.05)                  | 8.39 (8.25±0.14)                                    | 44.7 (42.2±2.5)      | 4.3 (3.8±0.5)         |
| 1:1       | 0.5% DIO      | 1.11 (1.10±0.01)                  | 9.66 (9.16±0.50)                                    | 49.2 (45.3±3.9)      | 5.3 (4.6±0.7)         |
| 1:1       | 0.5% DPE      | 1.11 (1.10±0.01)                  | 8.66 (8.53±0.13)                                    | 46.8 (43.7±3.1)      | 4.5 (4.1±0.4)         |
| 1:1       | 0.5% NMP      | 1.11 (1.11±0.01)                  | 7.87 (7.39±0.48)                                    | 38.4 (36.9±1.5)      | 3.8 (3.1±0.3)         |

a) The average parameters were calculated over 10 independent cells.

**Table S7.** The photovoltaic parameters of the IDT-BC for the devices with the different amount of DIO treatment. All the data were obtained under illumination of AM 1.5G, 100 mW/ cm<sup>2</sup> light source.

| D:A ratio | Condition | <sup>a)</sup> V <sub>OC</sub> [V] | <sup>a)</sup> J <sub>SC</sub> [mA/cm <sup>2</sup> ] | <sup>a)</sup> FF [%] | <sup>a)</sup> PCE [%] |
|-----------|-----------|-----------------------------------|-----------------------------------------------------|----------------------|-----------------------|
| 1:1.5     | 0.5% DIO  | 1.14 (1.11±0.03)                  | 9.13 (8.91±0.22)                                    | 54.3 (51.7±2.6)      | 5.7 (5.2±0.5)         |
| 1:1.5     | 1% DIO    | 1.11 (1.10±0.01)                  | 8.97 (8.59±0.38)                                    | 52.4 (49.1±3.3)      | 5.2 (4.6±0.6)         |
| 1:1.5     | 1.5% DIO  | 1.11 (1.10±0.01)                  | 9.48 (9.17±0.31)                                    | 48.6 (47.7±0.9)      | 5.1 (4.9±0.2)         |
| 1:1.5     | 2% DIO    | 1.11 (1.10±0.01)                  | 9.07 (8.90±0.17)                                    | 49.7 (47.5±2.2)      | 5.0 (4.7±0.4)         |

a) The average parameters were calculated over 10 independent cells.

**Table S8.** The photovoltaic parameters of the IDT-BC for the devices with the different D:A ratio at thermal treatment 150°C, 10 min. All the data were obtained under illumination of AM 1.5G, 100 mW/ cm<sup>2</sup> light source.

| D:A ratio | Condition     | <sup>a)</sup> V <sub>OC</sub> [V] | <sup>a)</sup> J <sub>SC</sub> [mA/cm <sup>2</sup> ] | <sup>a)</sup> FF [%] | <sup>a)</sup> PCE [%] |
|-----------|---------------|-----------------------------------|-----------------------------------------------------|----------------------|-----------------------|
| 1:1       | 150°C, 10 min | 1.06 (1.05±0.01)                  | 10.87 (10.37±0.50)                                  | 54.0 (49.1±4.9)      | 6.2 (5.4±0.8)         |
| 1:1.5     | 150°C, 10 min | 1.08 (1.06±0.01)                  | 10.53 (10.46±0.06)                                  | 55.5 (54.9±0.6)      | 6.3 (6.1±0.2)         |
| 1:2       | 150°C, 10 min | 1.05 (1.05±0.01)                  | 7.43 (7.36±0.07)                                    | 50.1 (49.1±1.0)      | 3.9 (3.81±0.1)        |

a) The average parameters were calculated over 10 independent cells.

## 7. Light-Intensity Dependence Statistics

**Table S9.** Summary of  $n$  and  $a$  values for the light intensity dependent  $J_{SC}$  and  $V_{OC}$ .

| <b>Active layer</b>    | <b><math>n</math></b> | <b><math>a</math></b> |
|------------------------|-----------------------|-----------------------|
| PBDB-T:IDT-C8-BC=1:1.5 | 1.00                  | 1.00                  |
| PBDB-T:IDT-BC=1:1.5    | 1.26                  | 1.00                  |

## 8. SCLC Measurements

Hole-only devices were fabricated for the dark J-V measurements with device structure of ITO/PEDOT: PSS/ Active layer /MoOx/Ag. Electron-only devices were fabricated for the dark J-V measurements with device structure of ITO/ZnO/PhenoNaDPO/ Active layer /PhenoNaDPO/Ag. The single-carrier device was connected to a Source Measure Unit (Keithley, Model 2400 source meter), which provided DC voltage to the hole-only devices. The 2400 was also used to record the currents under different DC voltage conditions. The J-V signals was detected and recorded. The J-V characteristics were further analyzed by the space-charge-limited-current (SCLC) method to extract zero-field carrier mobilities, where SCLC is described by:

$$j = \frac{9\varepsilon_0\varepsilon_r\mu_0V^2}{8L^3} \exp\left[0.89\beta\sqrt{\frac{V}{L}}\right] \quad (\text{E1})$$

where J is the current density, L is the film thickness of the active layer,  $\mu_0$  is the hole or electron mobility,  $\varepsilon_r$  is the relative dielectric constant of the transport medium,  $\varepsilon_0$  is the permittivity of free space ( $8.85 \times 10^{-12}$  F m<sup>-1</sup>), V (= V<sub>appl</sub> - V<sub>bi</sub>) is the internal voltage in the device, where V<sub>appl</sub> is the applied voltage to the device and V<sub>bi</sub> is the built-in voltage due to the relative work function difference of the two electrodes.

**Table S10.** Hole and electron mobilities of the binary/ternary OSCs

| Active layer           | $\mu_h$ [ $\times 10^{-4}$ cm <sup>2</sup> V <sup>-1</sup> s <sup>-1</sup> ] | $\mu_e$ [ $\times 10^{-4}$ cm <sup>2</sup> V <sup>-1</sup> s <sup>-1</sup> ] | $\mu_h/\mu_e$ |
|------------------------|------------------------------------------------------------------------------|------------------------------------------------------------------------------|---------------|
| PBDB-T:IDT-C8-BC=1:1.5 | 2.85±0.1                                                                     | 3.00±0.1                                                                     | 0.95          |
| PBDB-T:IDT-BC=1:1.5    | 2.75±0.1                                                                     | 1.36±0.1                                                                     | 2.02          |





## 9. Transmission Electron Microscopy (TEM) Characterization.

Films were spun-cast on PEDOT:PSS-coated glass substrates. The IDT-C8-BC-based and IDT-BC-based BHJ films were floated off the substrates in deionized water and collected on lacey carbon coated TEM grids (Electron Microscopy Sciences). Middle range TEM images were recorded in bright field mode with a microscope operating at 120 keV (JEM-2100F), using eagle CCD camera (FEI).

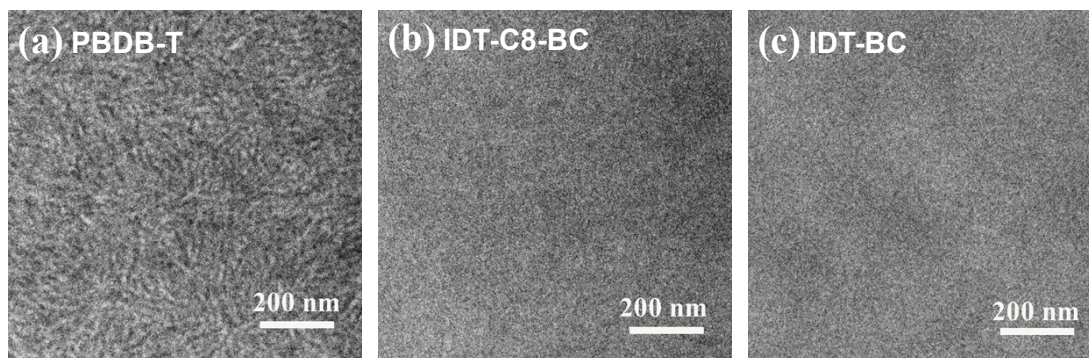

**Figure S5.** TEM images of (a) PBDB-T film, (b) IDT-C8-BC film and (c) IDT-BC film.

## 10. Solution NMR and HR-MS spectra

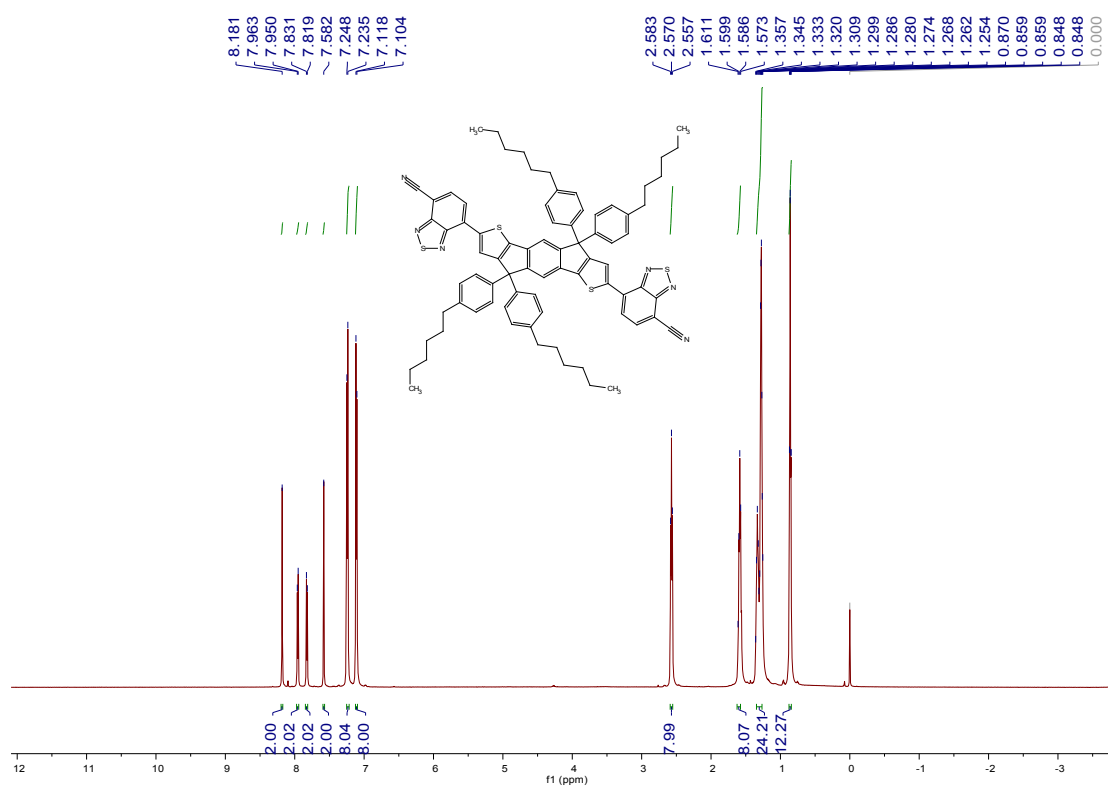

**<sup>1</sup>H NMR Spectrum of IDT-BC**

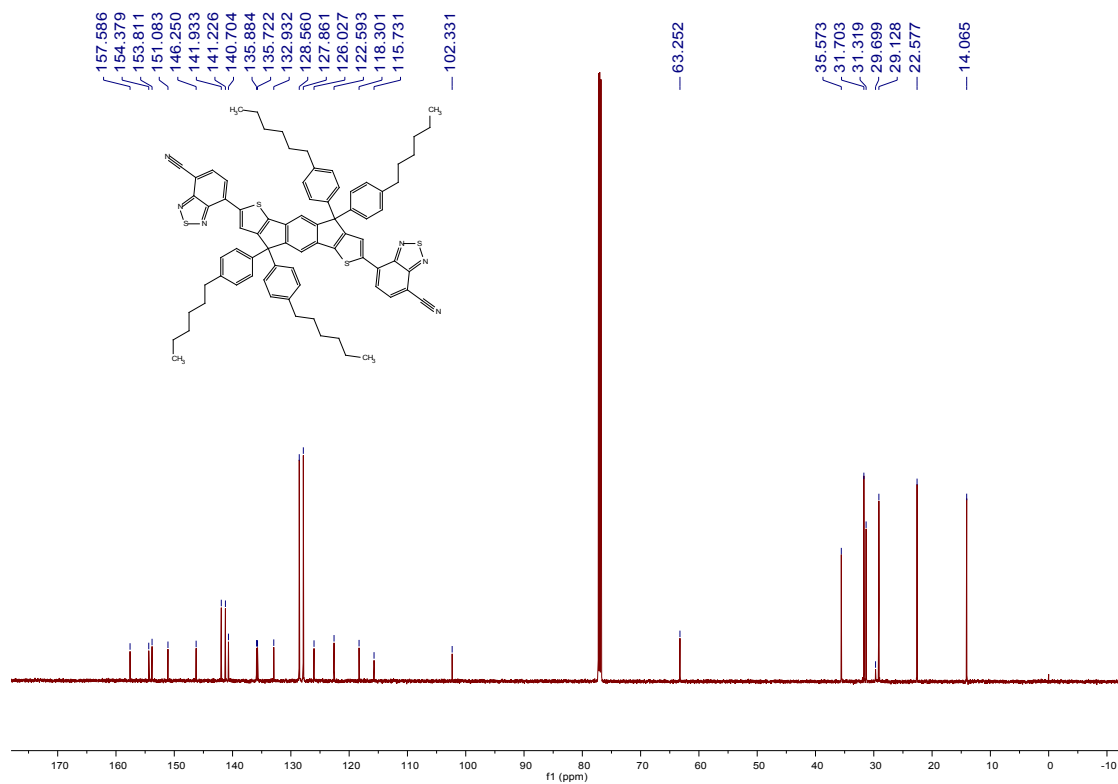

# <sup>13</sup>C NMR Spectrum of IDT-BC

## Mass Spectrum List Report

**Analysis Info**  
Analysis Name: D:\Data\HYMSKD\_0\_11\_000003.d  
Method: 5-12-DADOU  
Sample Name: 2018-6-7-MD  
Comment: PeptideMix NS=8 TF=1.2  
Acquisition Date: 8/25/2019 3:57:03 PM  
Operator: solarix  
Instrument: solarix

**Acquisition Parameter**

|                          |            |                   |     |                       |                          |
|--------------------------|------------|-------------------|-----|-----------------------|--------------------------|
| Polarity                 | Positive   | n/a               | n/a | No. of Laser Shots    | 100                      |
| n/a                      | n/a        | No. of Cell Fills | 1   | Laser Power           | 75.0 lp                  |
| Broadband Low Mass       | 53.8 m/z   | n/a               | n/a | n/a                   | n/a                      |
| Broadband High Mass      | 1500.0 m/z | n/a               | n/a | n/a                   | n/a                      |
| Acquisition Mode         | Single MS  | n/a               | n/a | Calibration Date      | Fri Feb 21 02:36:54 2014 |
| Pulse Program            | basic      | n/a               | n/a | Data Acquisition Size | 1048576                  |
| Source Accumulation      | 0.100 sec  | n/a               | n/a | Apodization           | Sine-Bell Multiplication |
| Ion Accumulation Time    | 0.500 sec  | n/a               | n/a | Apodization           | Apodization              |
| Flight Time to Acq. Cell | 0.001 sec  | n/a               | n/a |                       |                          |

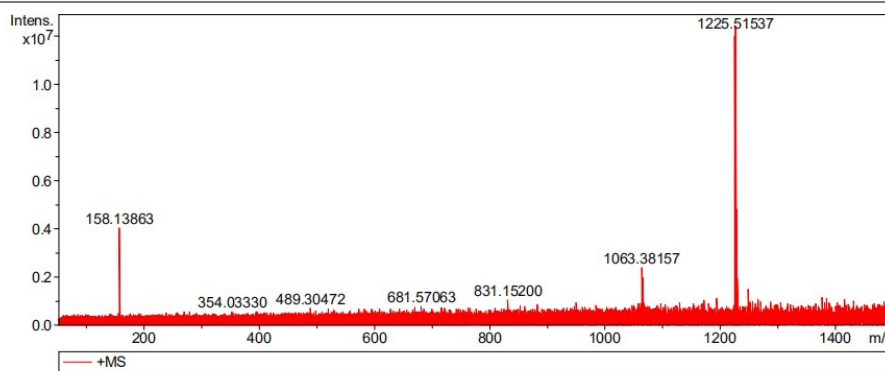

## HR-MS spectrum of IDT-BC

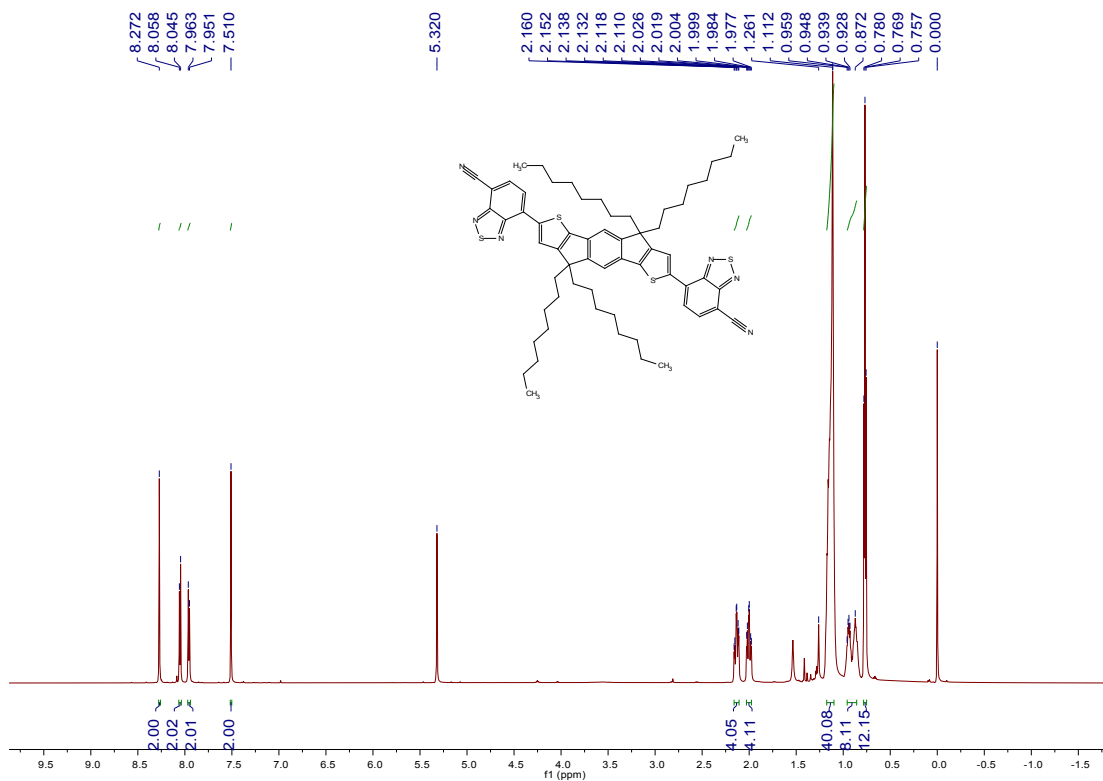

# <sup>1</sup>H NMR Spectrum of IDT-C8-BC

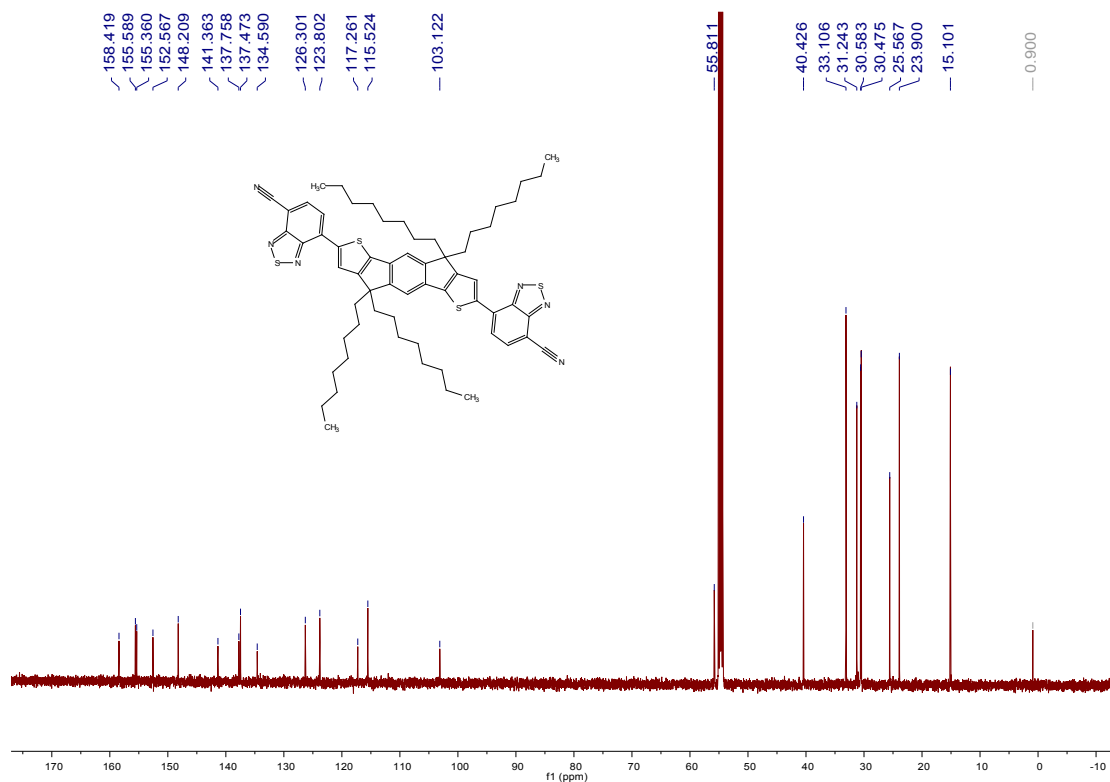

# <sup>13</sup>C NMR Spectrum of IDT-C8-BC

## Mass Spectrum List Report

| Analysis Info            |                              |                   |     | Acquisition Date      |                          |
|--------------------------|------------------------------|-------------------|-----|-----------------------|--------------------------|
| Analysis Name            | D:\Data\HYYSKD_0_I3_000008.d |                   |     | 8/25/2019 4:05:53 PM  |                          |
| Method                   | 5-12-DADOU                   |                   |     | Operator              |                          |
| Sample Name              | 2018-6-7-MD                  |                   |     | Instrument            | solariX                  |
| Comment                  | PeptideMix NS=8 TF=1.2       |                   |     |                       |                          |
| Acquisition Parameter    |                              |                   |     |                       |                          |
| Polarity                 | Positive                     | n/a               | n/a | No. of Laser Shots    | 100                      |
| n/a                      | n/a                          | No. of Cell Fills | 1   | Laser Power           | 75.0 lp                  |
| Broadband Low Mass       | 53.8 m/z                     | n/a               | n/a | n/a                   | n/a                      |
| Broadband High Mass      | 1500.0 m/z                   | n/a               | n/a | n/a                   | n/a                      |
| Acquisition Mode         | Single MS                    | n/a               | n/a | Calibration Date      | Fri Feb 21 02:36:54 2014 |
| Pulse Program            | basic                        | n/a               | n/a | Data Acquisition Size | 1048576                  |
| Source Accumulation      | 0.100 sec                    | n/a               | n/a | Apodization           | Sine-Bell Multiplication |
| Ion Accumulation Time    | 0.500 sec                    | n/a               | n/a | Apodization           | Apodization              |
| Flight Time to Acq. Cell | 0.001 sec                    | n/a               | n/a |                       |                          |

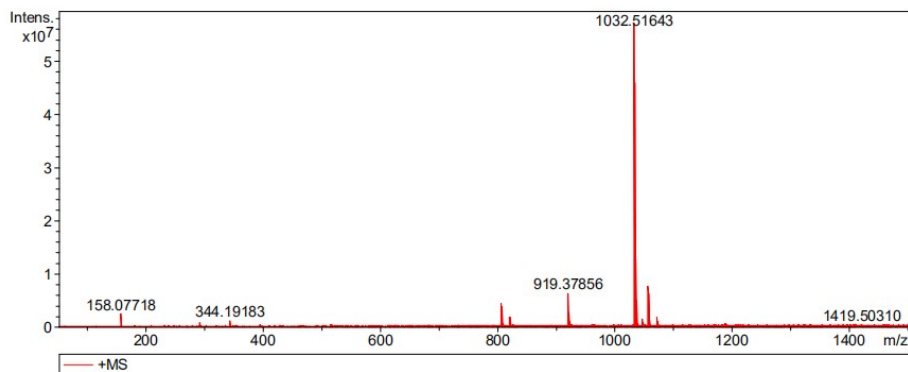

# HR-MS spectrum of IDT-C8-BC

## 11. Supporting Information References

1. S. Shi, P. Chen, Y. Chen, K. Feng, B. Liu, J. Chen, Q. Liao, B. Tu, J. Luo, M. Su, H. Guo, M. G. Kim, A. Facchetti and X. Guo, *Adv. Mater.*, 2019, **31**, 1905161.
2. A. M. Thooft, K. Cassaidy and B. VanVeller, *J. Org. Chem.*, 2017, **82**, 8842-8847.
3. W. Wen, L. Ying, B. B. Hsu, Y. Zhang, T. Q. Nguyen and G. C. Bazan, *Chem. Commun.*, 2013, **49**, 7192-7194.
